# Supplementary material for: Prediction of Ross River Virus Incidence Using Mosquito Data in Three Cities of Queensland, Australia
Source: MDPI journal article supplement (doi:10.3390/biology12111429), 2023-11-13
Supplement: s1 [file s1]

## Supplementary Material

### **Text S2. R code. Prediction of Ross River virus incidence using mosquito data in three cities of Queensland, Australia.**

```
# R packages
```

```
library(reshape2)
```

```
library(openxlsx)
```

```
library(dplyr)
```

```
library(data.table)
```

```
library(raster)
```

```
library(ncdf4)
```

```
library(lubridate)
```

```
library(imputeTS)
```

```
library(tidyverse)
```

```
library(Hmisc)
```

```
library(corrplot)
```

```
library(ggplot2)
```

```
library(ggcorrplot)
```

```
library(caret)
```

```
library(MASS)
```

```
library(Metrics)
```

```
library(modelr)
```

```
library(pscl)
```

```
library(mgcv)
```

```
library(performance)
```

```
library(patchwork)
```

## Data collation

```
# Function of calculating week numbers.
```

```
WeekNo <- function(myDate) {
```

```
  WeekNo <- ifelse(weekdays(as.Date(paste(format(as.Date(myDate), "%Y"), "01-01", sep = "-")))
== "Monday",
```

```
    as.numeric(format(as.Date(myDate), "%W")),
```

```
    as.numeric(format(as.Date(myDate), "%W")) + 1)
```

```
  return(WeekNo)
```

```
}
```

```
# Import the excel with the SA2 areas and corresponding grid numbers.
```

```
# This requires a spatial join of Queensland SA2 map and grid maps in ArcGIS.
```

```
GSA2 <- read.xlsx("C:/Users/qianwei/Desktop/Grid_SA2.xlsx", sheet = "Grid_SA2")
```

```
# Function of reading NC files and extracting climate data.
```

```
# lpath is the import file path, and Epath is the export file path, Exva means the exposure
variable.
```

```
ExvaNC <- function(y) {
```

```
  Exva <- brick(paste(y, lpath, sep = ""))
```

```

dim(Exva)

# Read the layers in the brick as a data frame

# The number of layers is the third dimension of the original database

Exva.df <- as.data.frame(Exva[[1:dim(Exva)[3]]], xy = T)

Exva.df <- Exva.df %>%

  rename(Latitude = y, Longitude = x)

Exva.j <- left_join(GSA2, Exva.df, by = c("Latitude", "Longitude"))

Exva.m <- reshape2::melt(Exva.j, id.vars = c("SA2"), measure.vars = c(4:(dim(Exva)[3] + 3)))

Exva.mm <- Exva.m[! (is.na(Exva.m$value)), ]

Exva.s <- Exva.mm %>%

  group_by(variable, SA2) %>%

  summarise(Exvaavg = mean(value), Exvamax = max(value), Exvamin = min(value), n = n())

write.xlsx(Exva.s, paste(Epath, y, ".xlsx", sep = ""))

}

# Set the lpath and Epath, then extract weather data from 1999 to 2020 to excel documents
(use rainfall data as an example).

setwd("C:/Users/Qianwei/Downloads/")

lpath <- ".daily_rain.nc"

Epath <- "C:/Users/Qianwei/Desktop/Rain"

for (y in 1999:2020) {

  ExvaNC(y)

```

```
}
```

```
# Aggregate the excel files extracted.
```

```
path <- "C:/Users/Qianwei/Desktop/"
```

```
filenames_list <- list.files(path = path, pattern = "\\\\.xlsx$", full.names = T)
```

```
All <- lapply(filenames_list, function(filename) {
```

```
  filename <- read.xlsx(filename, sheet = 1)
```

```
  filename
```

```
})
```

```
# Collate the aggregated data (use rainfall data as an example).
```

```
Rain <- do.call(rbind.data.frame, All)
```

```
tail(Rain)
```

```
Rain$Year <- as.numeric(substr(Rain$variable, 2, 5))
```

```
Rain$Month <- as.numeric(substr(Rain$variable, 7, 9))
```

```
Rain$Day <- as.numeric(substr(Rain$variable, 10, 12))
```

```
Rain$Date <- as.Date(with(Rain, paste(Year, Month, Day, sep = "-")), "%Y-%m-%d")
```

```
Rain$Week <- WeekNo(Rain$Date)
```

```
tail(Rain)
```

```
Rain.g <- Rain %>%
```

```
  group_by(SA2, Year, Week)
```

```
Rain.s <- Rain.g %>%
```

```

  summarise(Rainavg = mean(Exvaavg), Rainmax = max(Exvamax), Rainmin = min(Exvamin),
  Rainsd = sd(Exvaavg), n = sum(n))

head(Rain.s)

length(unique(Rain.s$SA2))

write.xlsx(Rain.s, "C:/Users/Qianwei/Desktop/Rain.xlsx")

```

```

# Collating data (other than NC files)

```

```

# NDVI

```

```

path <- "C:/Users/Qianwei/Desktop/NDVI"

```

```

filenames_list <- list.files(path = path, full.names = TRUE)

```

```

All <- lapply(filenames_list, function(filename) {

```

```

  data <- read.table(filename, header = FALSE, sep = " ", dec = ".", skip = 6, nrow = 681)

```

```

  data <- data[, 2:842]

```

```

  data <- reshape2::melt(data, measure.vars = c(1:841))

```

```

  data$value[data$value == 99999.9] <- NA

```

```

  data <- data[!is.na(data$value), ]

```

```

  data$colno <- seq(length = nrow(data))

```

```

  data <- data[, 2:3]

```

```

  data <- left_join(GSA2, data, by = c("colno"))

```

```

  NDVI <- data %>%

```

```

    group_by(SA2) %>%

```

```

    summarise(NDVIavg = mean(value, na.rm = TRUE))

```

```

NDVI$Date <- as.numeric(substring(filename, 59, 64))

NDVI

})

NDVI <- do.call(rbind.data.frame, All)


#Do interpolation

SA2 <- unique(NDVI$SA2)

NDVI.i <- data.frame()

for (i in 1:length(SA2)) {

  for (j in 1:12) {

    snum <- as.numeric(SA2[i])

    NDVI.sub <- dplyr::filter(NDVI.r, SA2 == snum & Month == j)

    NDVI.sub <- NDVI.sub %>%

      na_interpolation(option = "linear")

    NDVI.i <- dplyr::bind_rows(NDVI.i, NDVI.sub)

    print(paste(i, j, NDVI.sub[1, 5], sep = ", "))

  }

}


# Southern Oscillation Index

SOI <- read.xlsx("SOI.xlsx", sheet = 1)

Date <- read.xlsx("Date.xlsx", sheet = 1)

```

```

SOI.j <- left_join(SOI, Date, by = c("Year", "Month"))

SOI.g <- SOI.j %>%

  group_by(Year, Week)

SOI.s <- SOI.g %>%

  summarise(SOIavg = mean(Southern.Oscillation.Index), n = n())

```

# El Niño & La Niña

```

ELLA <- read.xlsx("ELLA.xlsx", sheet = 1)

Date <- read.xlsx("Date.xlsx", sheet = 1)

ELLA.j <- left_join(ELLA, Date, by = c("Year", "Month"))

ELLA.g <- ELLA.j %>%

  group_by(Year, Week)

ELLA.s <- ELLA.g %>%

  summarise(ELmedian = median(ElNino), LAmmedian = median(LaNina), n = n())

```

# Human population.

```

setwd("C:/Users/Qianwei/Desktop/")

HP <- read.xlsx("HP.xlsx", sheet = "hp")

HP.m = reshape2::melt(HP, id.vars = c("SA2"), measure.vars = c(2:21))

HP.m$Year <- as.numeric(as.character(HP.m$variable))

# Set the date of the population as 1st July of each year

HP.m$Date <- as.Date(with(HP.m, paste(Year, 7, 1, sep = "-")), "%Y-%m-%d")

```

```

Date <- read.xlsx("C:/Users/Qianwei/Desktop/Date.xlsx", sheet = 2)

Datehp <- Date[c(1, 5)]

Datehp$Date <- as.Date(Datehp$Date, origin = "1899-12-30", format = "%Y-%m-%d")

HP.m <- HP.m[c(1, 3, 5)]


SA2 <- unique(HP.m$SA2)

HP.f <- data.frame()

for (i in 1:length(SA2)) {

  snum <- as.numeric(SA2[i])

  HP.sub <- dplyr::filter(HP.m, SA2 == snum)

  HP.j <- left_join(Datehp, HP.sub, by = c("Date"))

  HP.i <- HP.j %>%

    na_interpolation(option = "linear")

  HP.f <- dplyr::bind_rows(HP.f, HP.i)

  print(paste(i, HP.sub[1, 3], sep = ","))

}

HP <- HP.f


# Ross River virus data.

RRV <- read.xlsx("C:/Users/Qianwei/Desktop/RRV.xlsx", sheet = "RRV")

RRV.s <- RRV %>%

  group_by(Date, SA2) %>%

```



```

summarise(RRVn = n())

RRV.j <- full_join(Date, RRV.s, by = c("Date"))

RRV.j$Date <- as.Date(RRV.j$Date, origin = "1899-12-30", format = "%Y-%m-%d")

RRV.c <- left_join(HP.f, RRV.j, by = c("Date", "SA2", "Week"))

RRV.c <- RRV.c[c(1:4, 8)]

RRV.c$RRVn[is.na(RRV.c$RRVn)] <- 0

SA2 <- unique(RRV.c$SA2)

RRV.f <- data.frame()

for (i in 1:length(SA2)) {

  snum <- as.numeric(SA2[i])

  RRV.sub <- RRV.c[which(RRV.c$SA2 == snum), ]

  RRV.sub <- RRV.sub %>%

    arrange(Date)

  RRV.sub$RRVhn <- cumsum(RRV.sub$RRVn)

  RRV.f <- dplyr::bind_rows(RRV.f, RRV.sub)

  print(paste(i, RRV.sub[1, 3], sep = ", "))

}

RRV <- RRV.f %>%

  group_by(Week, SA2) %>%

  summarise(Date = first(Date), HPavg = mean(value), RRVn = sum(RRVn), RRVhn = max(RRVhn))

# Calculate the susceptible human populations.

HP$HPsus <- as.numeric(as.integer(HP$HPavg - HP$RRVhn - HP$Cases))

```

## Model building.

# Split training set and validation set (use data of Brisbane as an example)

```
BMAA <- MAAD[MAAD$Region == "B", ]
```

```
BMAAn <- BMAA[!is.na(BMAA$Totalmosquito), ]
```

# Calculating CCF of lagged variables

```
BMAAs <- BMAAn %>%
```

```
  group_by(Year, Week) %>%
```

```
  summarise(MaxTavg = mean(MaxTavg), Rangeavg = mean(Rangeavg), MaxHavg =
    mean(MaxHavg), MinHavg = mean(MinHavg), Rainavg = mean(Rainavg), VP3avg =
    mean(VP3avg), VP9avg = mean(VP9avg), Evapavg = mean(Evapavg), Maaavg = mean(Maaavg),
    SOLavg = mean(SOLavg), Elmed = median(Elmed), Lamed = median(Lamed), NDVIavg =
    mean(NDVIavg), HPSus = mean(HPSus), RRVn = sum(RRVn), Aavg = mean(Ae.vigilax), Aevt =
    mean(Ae.vittiger), Aent = mean(Ae.notoscriptus), Cxal = mean(Cx.annulirostris), Cxst =
    mean(Cx.sitiens), aepc = mean(Ae.procax), anan = mean(An.annulipes), cqli = mean(Cq.linealis),
    cxob = mean(Cx.orbostiensis), mauf = mean(Ma.uniformis), vefu = mean(Ve.funerea), vemk =
    mean(Ve.marks), Tomos = mean(Totalmosquito))
```

```
RRV <- ts(BMAAs[which(BMAAs$Year > 2012 | (BMAAs$Year == 2012 & BMAAs$Week >
29)), ]$RRVn)
```

# Calculate CCF by spearman, predictors including mosquito abundance

```
cor=c()
```

```
for (Ncor in 0:52) {
```

```
  exl <- lag(BMAAs[,3:15], n = Ncor)
```

```
  exl1 <- merge(BMAAs[,1:2], exl, by = 0, all = TRUE)
```

```
  exl2 <- exl1[order(exl1$Week), ]
```

```
  exl3 <- exl2[which(exl2$Year > 2012 | (exl2$Year == 2012 & exl2$Week > 29)), 4:16]
```

```
  cors <- cor(exl3, RRV, use = "complete.obs", method = 'spearman')
```

```
  cors
```

```
  cor <- cbind(cor, cors)
```

```

}
# Get two largest (positive, negative and absolute) values for each exposure
Tcor <- t(cor)
length(Tcor[,1])
Mcor <- c()
for (C in 1:13) {
  M <- c()
  maxc <- which(Tcor[,C] == max(Tcor[,C]))
  minc <- which(Tcor[,C] == min(Tcor[,C]))
  M <- c(maxc[1], minc[1])
  Mcor <- rbind(Mcor, M)
}
rownames(Mcor) <- rownames(cor)
colnames(Mcor) <- c("Pos_max", "Neg_max")

# The lagged time for mosquito abundance are 3 months
cor=c()
for (Ncor in 0:13) {
  exl <- lag(BMAAs[,18:30], n = Ncor)
  exl1 <- merge(BMAAs[,1:2], exl, by = 0, all = TRUE)
  exl2 <- exl1[order(exl1$Week), ]
  exl3 <- exl2[which(exl2$Year > 2012 | (exl2$Year == 2012 & exl2$Week > 29)), 4:16]
  cors <- cor(exl3, RRV, use = "complete.obs", method = 'spearman')
  cors
  cor <- cbind(cor, cors)
}
# Get two largest (positive, negative and absolute) values for each exposure

```

```

Tcor <- t(cor)
length(Tcor[,1])
Ncor <- c()
for (C in 1:13) {
  N <- c()
  maxc <- which(Tcor[,C] == max(Tcor[,C]))
  minc <- which(Tcor[,C] == min(Tcor[,C]))
  N <- c(maxc[1], minc[1])
  Ncor <- rbind(Ncor, N)
}
rownames(Ncor) <- rownames(cor)
colnames(Ncor) <- c("Pos_max", "Neg_max")

# Add lagged variables to the original data set
BMAA <- BMAA %>%
  arrange(Year, Week)
BMAA.tr <- BMAA %>%
  group_by(SA2) %>%
  mutate(MaxTlag1 = dplyr::lag(MaxTavg, n = Mcor[1,1], default = NA),
         MaxTlag2 = dplyr::lag(MaxTavg, n = Mcor[1,2], default = NA),
         Rangelay1 = dplyr::lag(Rangeavg, n = Mcor[2,1], default = NA),
         Rangelay2 = dplyr::lag(Rangeavg, n = Mcor[2,2], default = NA),
         MaxHlag1 = dplyr::lag(MaxHavg, n = Mcor[3,1], default = NA),
         MaxHlag2 = dplyr::lag(MaxHavg, n = Mcor[3,2], default = NA),
         MinHlag1 = dplyr::lag(MinHavg, n = Mcor[4,1], default = NA),
         MinHlag2 = dplyr::lag(MinHavg, n = Mcor[4,2], default = NA),
         Rainlag1 = dplyr::lag(Rainavg, n = Mcor[5,1], default = NA),

```

```
Rainlag2 = dplyr::lag(Rainavg, n = Mcor[5,2], default = NA),
VP3lag1 = dplyr::lag(VP3avg, n = Mcor[6,1], default = NA),
VP3lag2 = dplyr::lag(VP3avg, n = Mcor[6,2], default = NA),
VP9lag1 = dplyr::lag(VP9avg, n = Mcor[7,1], default = NA),
VP9lag2 = dplyr::lag(VP9avg, n = Mcor[7,2], default = NA),
Evaplag1 = dplyr::lag(Evapavg, n = Mcor[8,1], default = NA),
Evaplag2 = dplyr::lag(Evapavg, n = Mcor[8,2], default = NA),
Maaelag1 = dplyr::lag(Maaeavg, n = Mcor[9,1], default = NA),
Maaelag2 = dplyr::lag(Maaeavg, n = Mcor[9,2], default = NA),
SOllag1 = dplyr::lag(SOlavg, n = Mcor[10,1], default = NA),
SOllag2 = dplyr::lag(SOlavg, n = Mcor[10,2], default = NA),
ELlag1 = dplyr::lag(Elmed, n = Mcor[11,1], default = NA),
ELlag2 = dplyr::lag(Elmed, n = Mcor[11,2], default = NA),
LAlag1 = dplyr::lag(Lamed, n = Mcor[12,1], default = NA),
LAlag2 = dplyr::lag(Lamed, n = Mcor[12,2], default = NA),
NDVllag1 = dplyr::lag(NDVlavg, n = Mcor[13,1], default = NA),
NDVllag2 = dplyr::lag(NDVlavg, n = Mcor[13,2], default = NA),
Aevglag1 = dplyr::lag(Ae.vigilax, n = Ncor[1,1], default = NA),
Aevglag2 = dplyr::lag(Ae.vigilax, n = Ncor[1,2], default = NA),
Aevtlag1 = dplyr::lag(Ae.vittiger, n = Ncor[2,1], default = NA),
Aevtlag2 = dplyr::lag(Ae.vittiger, n = Ncor[2,2], default = NA),
Aentlag1 = dplyr::lag(Ae.notoscriptus, n = Ncor[3,1], default = NA),
Aentlag2 = dplyr::lag(Ae.notoscriptus, n = Ncor[3,2], default = NA),
Cxallag1 = dplyr::lag(Cx.annulirostris, n = Ncor[4,1], default = NA),
Cxallag2 = dplyr::lag(Cx.annulirostris, n = Ncor[4,2], default = NA),
Cxstlag1 = dplyr::lag(Cx.sitiens, n = Ncor[5,1], default = NA),
Cxstlag2 = dplyr::lag(Cx.sitiens, n = Ncor[5,2], default = NA),
```

```

Aepclag1 = dplyr::lag(Ae.procax, n = Ncor[6,1], default = NA),
Aepclag2 = dplyr::lag(Ae.procax, n = Ncor[6,2], default = NA),
Ananlag1 = dplyr::lag(An.annulipes, n = Ncor[7,1], default = NA),
Ananlag2 = dplyr::lag(An.annulipes, n = Ncor[7,2], default = NA),
Cqlilag1 = dplyr::lag(Cq.linealis, n = Ncor[8,1], default = NA),
Cqlilag2 = dplyr::lag(Cq.linealis, n = Ncor[8,2], default = NA),
Cxoblag1 = dplyr::lag(Cx.orbostiensis, n = Ncor[9,1], default = NA),
Cxoblag2 = dplyr::lag(Cx.orbostiensis, n = Ncor[9,2], default = NA),
Mauflag1 = dplyr::lag(Ma.uniformis, n = Ncor[10,1], default = NA),
Mauflag2 = dplyr::lag(Ma.uniformis, n = Ncor[10,2], default = NA),
Vefulag1 = dplyr::lag(Ve.funerea, n = Ncor[11,1], default = NA),
Vefulag2 = dplyr::lag(Ve.funerea, n = Ncor[11,2], default = NA),
Vemklag1 = dplyr::lag(Ve.marks, n = Ncor[12,1], default = NA),
Vemklag2 = dplyr::lag(Ve.marks, n = Ncor[12,2], default = NA),
Tomoslag1 = dplyr::lag(Totalmosquito, n = Ncor[13,1], default = NA),
Tomoslag2 = dplyr::lag(Totalmosquito, n = Ncor[13,2], default = NA),
RRVlag1 = dplyr::lag(RRVn, n = 1, default = NA),
RRVlag2 = dplyr::lag(RRVn, n = 2, default = NA),
RRVlag3 = dplyr::lag(RRVn, n = 3, default = NA),
RRVlag4 = dplyr::lag(RRVn, n = 4, default = NA),
RRVlag5 = dplyr::lag(RRVn, n = 5, default = NA),
RRVlag6 = dplyr::lag(RRVn, n = 6, default = NA),
RRVlag7 = dplyr::lag(RRVn, n = 7, default = NA),
RRVlag8 = dplyr::lag(RRVn, n = 8, default = NA))

BMAA.tr$RRVh4 <- (BMAA.tr$RRVlag1)*4/10 + (BMAA.tr$RRVlag2)*3/10 +
(BMAA.tr$RRVlag3)*2/10 + (BMAA.tr$RRVlag4)*1/10

# Training set 1

```

```
#2014.8-2016.8
```

```
BMAA.va <- BMAA.tr[which(BMAA.tr$Year>2014 | (BMAA.tr$Year == 2014 &  
BMAA.tr$Week>31)), ]
```

```
BMAA.va <- BMAA.va[which(BMAA.va$Year<2016 | (BMAA.va$Year == 2016 &  
BMAA.va$Week<32)), ]
```

```
#2012.7-2014.7
```

```
BMAA.tr <- BMAA.tr[which(BMAA.tr$Year<2014 | (BMAA.tr$Year == 2014 &  
BMAA.tr$Week<32)), ]
```

```
BMAA.tr <- BMAA.tr[which(BMAA.tr$Year>2012 | (BMAA.tr$Year == 2012 &  
BMAA.tr$Week>29)), ]
```

```
# Training set 2
```

```
#2016.8-2018.8
```

```
BMAA.va <- BMAA.tr[which(BMAA.tr$Year>2016 | (BMAA.tr$Year == 2016 &  
BMAA.tr$Week>31)),]
```

```
BMAA.va <- BMAA.va[which(BMAA.va$Year<2018 | (BMAA.va$Year == 2018 &  
BMAA.va$Week<31)),]
```

```
#2012.7-2016.7
```

```
BMAA.tr <- BMAA.tr[which(BMAA.tr$Year<2016 | (BMAA.tr$Year == 2016 &  
BMAA.tr$Week<32)),]
```

```
BMAA.tr <- BMAA.tr[which(BMAA.tr$Year>2012 | (BMAA.tr$Year == 2012 &  
BMAA.tr$Week>29)),]
```

```
# Training set 3
```

```
#2018.8-
```

```
BMAA.va <- BMAA.tr[which(BMAA.tr$Year>2018 | (BMAA.tr$Year == 2018 &  
BMAA.tr$Week>30)),]
```

```
#2012.7-2018.7
```

```
BMAA.tr <- BMAA.tr[which(BMAA.tr$Year<2018 | (BMAA.tr$Year == 2018 &  
BMAA.tr$Week<31)),]
```

```
BMAA.tr <- BMAA.tr[which(BMAA.tr$Year>2012 | (BMAA.tr$Year == 2012 &  
BMAA.tr$Week>29)),]
```

```
BMAA.tr <- BMAA.tr[!is.na(BMAA.tr$Totalmosquito), ]
BMAA.va <- BMAA.va[!is.na(BMAA.va$Totalmosquito), ]
```

```
BMAA.tr_nf <- BMAA.tr
BMAA.tr <- within(BMAA.tr, {
  Elmed <- as.factor(Elmed)
  Lamed <- as.factor(Lamed)
})
```

```
BMAA.va <- within(BMAA.va, {
  Elmed <- as.factor(Elmed)
  Lamed <- as.factor(Lamed)
})
```

```
Data.tr <- BMAA.tr
Data.tr_nf <- BMAA.tr_nf
Data.va <- BMAA.va
```

```
# Model building
```

```
fit.negbin <- function(variables, data) {
  a <- "RRVn ~ "
  os <- "offset(log(HPsus))"
  for (m in 1:length(unique(variables))) {
    a <- paste(a, variables[m], sep = "+")
  }
  fit=glm.nb(as.formula(paste(a, os, sep = "+")), data = data)
  return(fit)
```



```

}
pvalue <- vector()
i <- 1
for (m in 1:length(unique(expt))) {
  fit.rep <- fit.negbin(expt[m], Data.tr_nf)
  pvalue.rep <- summary(fit.rep)$coefficients[,4]
  pvalue <- c(pvalue, pvalue.rep[-1])
  print(i)
  i = i + 1
}
pvalue <- as.data.frame(pvalue)
index <- pvalue$pvalue > 0.1
rvar.p <- vector()
if(any(pvalue$pvalue > 0.1))
  rvar.p <- rownames(pvalue)[row(pvalue) * index]
rvar.p
if(length(rvar.p) > 0) {
  np <- match(rvar.p, expt)
  np <- np[!is.na(np)]
  expt <- expt[-c(np)]
} else {
  expt <- expt
}
# Standardized regression coefficients
fit.negbin.stcoef <- function(variables, data) {
  stcoef <- vector()
  os <- "offset(log(HPsus))"

```

```

for (m in 1:length(unique(expt))) {
  a <- "RRVn ~ scale("
  a <- paste(a, expt[m], ")", sep = "")
  fit.rep <- glm.nb(as.formula(paste(a, os, sep="+")), data = Data.tr_nf)
  coef.rep <- round(fit.rep$coefficients, digits = 2)
  stcoef <- cbind(stcoef, coef.rep[-1])
  colnames(stcoef)[m] <- expt[m]
}
return(stcoef)
}

stcoef <- fit.negbin.stcoef(expt, Data.tr_nf)
index <- abs(stcoef[1, ]) < 0.1
rvar.src <- vector()
if(any(abs(stcoef[1, ]) < 0.1))
  rvar.src <- colnames(stcoef)[col(stcoef) * index]
rvar.src
if(length(rvar.src) > 0) {
  expt <- expt[-c(match(rvar.src, expt))]
} else {
  expt <- expt
}

# Removed variables at step 2
rvar.s2 <- unique(c(rvar.p, rvar.src))

# Backward screen
fit.formula <- function(variables) {
  a <- "RRVn ~ "

```

```

for (m in 1:length(unique(variables))) {
  a <- paste(a, variables[m], sep = "+")
}
return(a)
}

# Function of calculating VIF/BIC by removing/including exposures one by one
Selectexp.IC <- function(input, expset, s) {
  for (m in 1:length(unique(expset))) {
    a <- fit.formula(input)
    formula.rep <- as.formula(paste(paste(a, expset[m], sep = s), " + offset(log(HPsus))", sep = ""))
    fit.rep <- glm.nb(formula.rep, data = Data.tr)
    if (length(input) > 2) {
      vif.rep <- max(vif(fit.rep))
    } else {
      vif.rep <- 0
    }
    BIC.rep <- BIC(fit.rep)
    BIC.chgp <- 100 * (BIC.rep - BIC) / BIC
    IC.rep <- c(vif.rep, BIC.rep, BIC.chgp)
    IC <- rbind(IC, IC.rep)
  }
  colnames(IC) <- c("max_VIF", "BIC", "BIC_change")
  rownames(IC) <- c(expset)
  IC <- as.data.frame(IC)
  return(IC)
}

```

```

nrep <- 1
repeat {
  fit <- fit.negbin(expt, Data.tr)
  predictions <- fit %>% predict(Data.tr, type = "response")
  AIC <- AIC(fit, k = 2)
  BIC <- BIC(fit)
  HQIC <- as.numeric(-2*logLik(fit) + (length(fit$coefficients) * log(log(nrow(Data.tr)))))
  if (length(expt) > 1) {
    v <- vif(fit)
  } else {
    v <- data.frame(0, 0, 0)
  }
  v<-data.frame(v)
  index <- v$v >5
  rvar.vif <- vector()
  if(any(v[,1] > 5))
    rvar.vif <- rownames(v)[row(v) * index]
  rvar.vif
  if (length(rvar.vif) == 0 | length(rvar.vif) == length(expt)) {
    expti <- expt
  } else {
    expti <- expt[-c(match(rvar.vif, expt))]
  }

  # Remove variables if BIC increment is negative or lowest when removing the variable from the
  model

  fit <- fit.negbin(expti, Data.tr)
  AIC <- AIC(fit, k = 2)

```

```

BIC.o <- BIC(fit)

# Remove variables with lowest BIC increment until total BIC increment reaches 1%

BIC.chg <- 0

BIC <- BIC.o

while (BIC.chg < 0.5 & length(expti) > 1) {

  IC <- c()

  IC <- Selectexp.IC(expti, expti, "-")

  rvar.ic <- rownames(IC[which(IC[,3] < 0), ])

  if (length(rvar.ic) == length(expti)) {

    break

  } else if (length(rvar.ic) == 0) {

    rvar.ic <- rownames(IC[which.min(IC[,3]), ])

  } else {

    rvar.ic <- rvar.ic

  }

  expti <- expti[-c(match(rvar.ic, expti))]

  fit <- fit.negbin(expti, Data.tr)

  BIC <- BIC(fit)

  BIC.chg <- 100 * (BIC - BIC.o) / BIC.o

}

if(length(expti) > 0) {

  rvar.ic <- expt[-c(match(expti, expt))]

} else {

  rvar.ic <- vector()

}

rvar.bs <- unique(c(rvar.vif, rvar.ic))

```

```
# Step 4 Backward Screen
```

```
if (length(rvar.bs) == 0) {  
  ivar <- expt  
  exptb <- c()  
  IC <- rbind(c(0, 0, 0), c(0, 0, 0))  
} else {  
  if(length(rvar.bs) == length(expt)) {  
    IC <- c()  
    a <- c()  
    IC <- Selectexp.IC("", expt, "")  
    ivar <- rownames(IC[which.max(IC[,2]),])  
    ivar  
    exptb <- expt[-c(match(ivar, expt))]  
  }  
  else {  
    ivar <- expt[-c(match(rvar.bs, expt))]  
    exptb <- rvar.bs  
  }  
  fit <- fit.negbin(ivar, Data.tr)  
  BIC <- BIC(fit)  
  IC <- c()  
  IC <- Selectexp.IC(ivar, exptb, "+")  
  index <- (IC[,1] < 10 & IC[,3] < -0.1)  
  ivar.bs <- vector()  
  if(any(index))  
    ivar.bs <- rownames(IC)[(row(IC) * index)[,1]]  
  ivar <- c(ivar, ivar.bs)
```

```

}

nrep <- nrep + 1
if ((length(ivar) == 0) | (length(ivar) == length(expt)) | (nrep > 11)) {
  break
} else {
  expt <- ivar
}
}

# Final check and validation
fit <- fit.negbin(expt, Data.tr)
if (length(expt) > 1) {
  v <- vif(fit)
} else {
  v <- data.frame(0, 0, 0)
}
v<-data.frame(v)
index <- v$v >5
rvar.vif <- vector()
if(any(v[,1] > 5))
  rvar.vif <- rownames(v)[row(v) * index]
rvar.vif
if (length(rvar.vif) == length(expt)) {
  expt <- c("Week")
  out.rep <- paste("No variables included Fainal Step", " VIF", sep = "")
  Val.out[nrow(Val.out) + 1, ] <- out.rep

```

```

} else if (length(rvar.vif) > 0) {
  expt <- expt[-c(match(rvar.vif, expt))]
} else {
  expt <- expt
}

```

## Figure generation.

```

# Do prediction (use Brisbane data as an example)
fit <- fit.negbin(expt, Data.tr)
summary(fit)
predictions <- fit %>%
  predict(Data.tr, type = "response")
AIC <- AIC(fit, k = 2)
BIC <- BIC(fit)
HQIC <- as.numeric(-2 * logLik(fit) + (length(fit$coefficients) * log(log(nrow(Data.tr)))))
predB <- fit %>%
  predict(Data.tr, type = "response")
predB_v <- fit %>%
  predict(Data.va, type = "response")
predB[is.na(predB)] <- 0
predB_v[is.na(predB_v)] <- 0

T_pred <- Data.tr[c(1:3, 18:19)]
T_pred <- left_join(T_pred, DateW, by = c("Year", "Week"))
T_pred <- cbind(T_pred, predB = predB)
V_pred <- Data.va[c(1:3, 18:19)]
V_pred <- left_join(V_pred, DateW, by = c("Year", "Week"))

```



```

V_pred <- cbind(V_pred, predB_v = predB_v)
T_pred <- as.data.frame(T_pred)
V_pred <- as.data.frame(V_pred)

V_pred = rename(V_pred, predB = predB_v)
All_pred <- rbind(T_pred, V_pred)

All_predB <- All_pred %>%
  group_by(Week, Date, Year) %>%
  summarise(RRVn = sum(RRVn), predB = sum(predB))

# Plot predictive curve (use Brisbane data as an example)
fig <- ggplot(data = All_predB, aes(Date)) +
  geom_line(aes(y = RRVn, color = "Real data")) +
  geom_line(aes(y = predB, color = "Predicted value")) +
  scale_colour_manual(values = c("slateblue3", "black")) +
  geom_vline(aes(xintercept = as.Date("2018-01-30")), color = "orange3")+
  annotate(geom = "text", x = as.Date("2017-10-30"), y = 60, size = 5, color = "orange3",
    label = "Training Set          Validation Set") +
  labs(x = "", y = "RRV cases") +
  scale_x_date(date_labels = "%Y", date_breaks = "1 year", minor_breaks = "1 week", expand =
c(0, 0)) +
  theme(text = element_text(size = 12),
    legend.title = element_blank(),
    legend.position = c(0.2, 0.75),
    axis.line = element_line(colour = "grey20", size = 0.2),
    axis.text.x = element_text(angle = 25, vjust = 0.7),

```

```

axis.title.x = element_blank (),

panel.background = element_rect(fill = "white"))

# Plot mosquito abundance and log transformed RRV cases (use Brisbane data as an example)
BMAA.sp <- BMAA[which(BMAA$Year>2012 | (BMAA$Year == 2012 & BMAA$Week>29)), ]
#2012.7-

BMAA.sp <- BMAA.sp[!is.na(BMAA.sp$Totalmosquito), ]

BMAA.sp <- left_join(BMAA.sp, DateW, by = c("Year", "Week"))

BMAA.sp <- BMAA.sp %>%

  group_by(Date) %>%

  summarise(RRVn = sum(RRVn), Total = sum(Totalmosquito), Ae.vigilax = sum(Ae.vigilax),
Ae.vittiger = sum(Ae.vittiger), Ae.notoscriptus = sum(Ae.notoscriptus), Cx.annulirostris =
sum(Cx.annulirostris))

BMAA.s <- melt(BMAA.sp[-c(2)], id = "Date")

BMAA.sp$LogRRV <- log(BMAA.sp$RRVn + 1)

coeff <- 0.003 # Value used to transform the data

p <- ggplot(data = BMAA.sp, aes(x = Date, y = Total)) +

  geom_line(size = 0.7, color = "#E41A1C") +

  geom_line(aes(y = LogRRV / coeff), size = 0.8, color = "#377EB8") +

  scale_x_date(date_labels = "%Y", date_breaks = "1 year", minor_breaks = "1 week", expand =
c(0, 0)) +

  scale_y_continuous(

    name = "Total mosquito abundance",

    sec.axis = sec_axis(~. * coeff, name = "Log transformed RRV cases")

  ) +

  theme(text = element_text(size = 12),

    legend.title = element_blank(),

```

```

legend.text = element_text(face = "italic", size = 12),
legend.position = "top",
axis.line = element_line(colour = "grey20", size = 0.2),
axis.title.x = element_blank(),
axis.text.x = element_text(angle = 25, vjust = 0.7),
axis.title.y = element_text(size = 9, color = "#E41A1C"),
axis.title.y.right = element_text(color = "#377EB8", size = 9),
panel.background = element_rect(fill = "white")) +
ggtitle("      Brisbane")

# CCF plot (use Brisbane data as an example)
BMAAs <- BMAA %>%
  group_by(Year, Week) %>%
  summarise(RRVn = sum(RRVn), Aevg = mean(Ae.vigilax), Aevt = mean(Ae.vittiger), Aent =
mean(Ae.notoscriptus), Cxal = mean(Cx.annulirostris), Tomos = mean(Totalmosquito))
RRV <- ts(BMAAs$RRVn)
Bcor = c()
for (Ncor in 0:13) {
  exl <- lag(BMAAs[,4:8], n = Ncor)
  exl1 <- merge(BMAAs[,1:2], exl, by = 0, all = TRUE)
  exl2 <- exl1[order(exl1$Week), ]
  exl3 <- exl2[,4:8]
  Bcors <- cor(exl3, RRV, use = "complete.obs", method = 'spearman')
  Bcors
  Bcor <- cbind(Bcor, Bcors)
}
Bcor <- as.data.frame(Bcor)

```

```
row.names(Bcor) <- c("Ae.vigilax", "Ae.vittiger", "Ae.notoscriptus", "Cx.annulirostris", "Total  
mosquito abundance")
```

```
Bcor$Mos <- c(row.names(Rcor))
```

```
Bcor.m <- melt(Bcor, id = "Mos", variable.name = "Lag", value.name = "Correlation")
```

```
pBcor <- ggplot(data = Bcor.m, aes(x = Lag, y = Correlation, color = Mos)) +
```

```
  geom_point(size = 2) +
```

```
  geom_line(size = 0.5) +
```

```
  labs(x = "Number of lags", y = "Spearman correlation") +
```

```
  theme(text = element_text(size = 12),
```

```
    legend.title = element_blank(),
```

```
    legend.text = element_text(face = "italic", size = 12),
```

```
    legend.position = "right",
```

```
    axis.line = element_line(colour = "grey20", size = 0.2),
```

```
    axis.title.y = element_text(size = 12),
```

```
    axis.title.x = element_blank(),
```

```
    panel.background = element_rect(fill = "white")) +
```

```
  ggtitle("      Brisbane")
```

```
pB <- pBcor +
```

```
  geom_hline(aes(yintercept = 0))
```

```
# Correlation plot (use Brisbane data as an example)
```

```
B.c <- cor(BMAA[c(5:8, 19)], use = "complete.obs", method = 'spearman')
```

```
row.names(B.c)[5] <- c("Total mosquito abundance")
```

```
colnames(B.c)[5] <- c("Total mosquito abundance")
```

```
pBc <- ggcorrplot(B.c, method = "circle", lab = TRUE,
```

```
  colors = c("#377EB8", "white", "#E41A1C")) +
```

```
  theme(text = element_text(size = 12),
```

```
legend.title = element_blank(),  
panel.background = element_rect(fill = "white")) +  
ggtitle("    Brisbane")
```
