# Supplementary material for: Prediction of Ross River Virus Incidence Using Mosquito Data in Three Cities of Queensland, Australia
Source: MDPI journal article supplement (doi:10.3390/biology12111429), 2023-11-13
Supplement: s1 [file s1]

## Supplementary Material

**Table S1. Predictors selected in each training set of the modelling process and the standardised coefficients (sorted by absolute value of standardised coefficients).** <sup>†</sup>Redlands and Brisbane data generated three

training and validation sets, and Mackay generated four counterparts. <sup>††</sup>SC = Standardised Coefficients; Recent cases = log (weighted moving average of recent RRV cases in the past month + 1); Week = Week number in a year; TempMax = Maximum air temperature; TempR = Range of air temperature; RHMin = Relative humidity at the time of minimum temperature; RHMax = Relative humidity at the time of maximum temperature; SOI = Southern Oscillation Index; IEO = Index of Education and Occupation; IRSAD = The Index of Relative Socio-economic Advantage and Disadvantage; NDVI = Normalized Difference Vegetation Index. All the lags are weekly lags. \*\*\*p value < 0.001, \*p value < 0.05.

| Dataset <sup>†</sup>    | Redlands                                  | Brisbane                                 | Mackay                           |
|-------------------------|-------------------------------------------|------------------------------------------|----------------------------------|
|                         | Predictors, SC <sup>††</sup>              | Predictors, SC <sup>††</sup>             | Predictors, SC <sup>††</sup>     |
| Training set 4 (Obs.)   | -                                         | -                                        | 2007.9.1-2017.9.30 (2417)        |
| Validation set 4 (Obs.) | -                                         | -                                        | 2017.10.1-2020.8.30 (932)        |
|                         | -                                         | -                                        | Week, <b>-0.520</b> ***          |
|                         |                                           |                                          | Recent cases, <b>0.293</b> ***   |
|                         |                                           |                                          | Rainfall lag 45, -0.231          |
|                         |                                           |                                          | TempR lag 51, -0.056             |
|                         |                                           |                                          | NDVI lag 49, 0.009               |
| Training set 3 (Obs.)   | 2010.1.1-2018.1.30 (700)                  | 2012.7.1-2018.7.30 (2761)                | 2007.9.1-2015.9.30 (1894)        |
| Validation set 3 (Obs.) | 2018.2.1-2020.6.30 (531)                  | 2018.8.1-2019.12.30 (734)                | 2015.10.1-2017.10.30 (571)       |
|                         | Vapour pressure lag 35, <b>-0.630</b> *** | Recent cases, <b>0.463</b> ***           | Week, <b>-0.513</b> ***          |
|                         | El Niño lag 51, <b>-0.515</b> ***         | RHMin lag 36, <b>-0.332</b> ***          | Rainfall lag 45, <b>-0.339</b> * |
|                         | Recent cases, <b>0.515</b> ***            | Vapour pressure lag 9, 0.222             | Recent cases, <b>0.249</b> ***   |
|                         | RHMin, 0.224                              | Vapour pressure lag 29, -0.196           | El Niño lag 46, -0.144           |
|                         | RHMax lag 7, 0.159                        | <i>Ae.vigilax</i> lag 5, -0.156          | TempR lag 51, -0.101             |
|                         | Rainfall, -0.018                          | Week, -0.131                             | NDVI lag 49, -0.026              |
|                         |                                           | <i>Cx.annulirostris</i> lag 14, -0.126   |                                  |
|                         |                                           | <i>Cx.annulirostris</i> , <b>0.119</b> * |                                  |
|                         |                                           | Evapotranspiration lag 12, -0.105        |                                  |
|                         |                                           | RHMax, 0.088                             |                                  |
|                         |                                           | <i>Ae.notoscriptus</i> lag 14, 0.070     |                                  |
|                         |                                           | Vapour pressure, -0.030                  |                                  |
|                         |                                           | <i>Cx.annulirostris</i> lag 4, 0.024     |                                  |
|                         |                                           | Total mosquito abundance lag 13, 0.018   |                                  |
|                         |                                           | <i>Ae.notoscriptus</i> lag 6, -0.008     |                                  |

|                         |                                         |                                          |                                          |
|-------------------------|-----------------------------------------|------------------------------------------|------------------------------------------|
|                         |                                         | <i>Ae.vigilax</i> lag 1, -0.007          |                                          |
|                         |                                         | Total mosquito abundance lag 4, -0.006   |                                          |
| Training set 2 (Obs.)   | 2010.1.1-2016.1.30 (338)                | 2012.7.1-2016.7.30 (1733)                | 2007.9.1-2013.9.30 (1431)                |
| Validation set 2 (Obs.) | 2016.2.1-2018.2.30 (370)                | 2016.8.1-2018.8.30 (1028)                | 2013.10.1-2015.10.30 (487)               |
|                         | Recent cases, <b>0.705</b> ***          | El Niño lag 23, <b>-0.647</b> ***        | Rainfall lag 45, -0.354                  |
|                         | Vapour pressure lag 35, <b>-0.438</b> * | TempR, -0.447                            | Week, -0.336                             |
|                         | IRSAD, <b>0.351</b> ***                 | <i>Ae.vigilax</i> lag 5, -0.410          | Recent cases, <b>0.303</b> ***           |
|                         | Evapotranspiration lag 10, 0.303        | Recent cases, <b>0.376</b> ***           | Evapotranspiration lag 30, -0.279        |
|                         | TempMax lag 10, -0.123                  | Pan evaporation lag 12, <b>-0.357</b> *  | El Niño lag 46, -0.189                   |
|                         | Week, -0.062                            | <i>Cx.annulirostris</i> lag 14, -0.332   | Vapour pressure, -0.158                  |
|                         | TempR lag 9, -0.058                     | Week, -0.244                             | Total mosquito abundance, <b>0.155</b> * |
|                         | Pan evaporation lag 16, 0.012           | Vapour pressure lag 9, 0.224             | RHMax, 0.111                             |
|                         |                                         | RHMax, -0.160                            | TempR lag 51, -0.058                     |
|                         |                                         | <i>Ae.vigilax</i> lag 1, -0.134          | Vapour pressure lag 4, 0.036             |
|                         |                                         | <i>Cx.annulirostris</i> , <b>0.119</b> * | Vapour pressure lag 27, -0.006           |
|                         |                                         | <i>Ae.vittiger</i> lag 4, 0.109          |                                          |
|                         |                                         | Vapour pressure lag 29, -0.105           |                                          |
|                         |                                         | <i>Ae.notoscriptus</i> lag 14, 0.099     |                                          |
|                         |                                         | <i>Cx.annulirostris</i> lag 4, 0.092     |                                          |
|                         |                                         | TempMax lag 11, 0.045                    |                                          |
|                         |                                         | Total mosquito abundance lag 13, 0.033   |                                          |
|                         |                                         | <i>Ae.notoscriptus</i> lag 6, -0.027     |                                          |
|                         |                                         | Total mosquito abundance lag 4, -0.014   |                                          |
|                         |                                         | <i>Ae.vittiger</i> lag 10, 0.001         |                                          |
| Training set 1 (Obs.)   | 2010.1.1-2014.1.30 (152)                | 2012.7.1-2014.7.30 (824)                 | 2007.9.1-2011.9.30 (963)                 |
| Validation set 1 (Obs.) | 2014.2.1-2016.2.30 (201)                | 2014.8.1-2016.8.30 (909)                 | 2011.10.1-2013.10.30 (498)               |
|                         | IEO, 0.675                              | SOI, <b>0.319</b> *                      | Week, -0.416                             |
|                         | NDVI lag 47, 0.342                      | NDVI, -0.270                             | Recent cases, <b>0.377</b> ***           |
|                         | SOI lag 25, -0.285                      | RHMin lag 25, -0.249                     | NDVI lag 49, 0.248                       |
|                         | Rainfall, -0.263                        | Vapour pressure lag 29, -0.214           | Vapour pressure, 0.217                   |
|                         | Pan evaporation lag 16, 0.120           | Rainfall lag 10, 0.132                   | Vapour pressure lag 27, -0.212           |
|                         | RHMin lag 24, 0.117                     | SOI lag 42, 0.109                        | El Niño lag 46, -0.152                   |
|                         | Rainfall lag 2, 0.104                   | Recent cases, 0.067                      | Vapour pressure lag 4, -0.125            |
|                         | Recent cases, 0.077                     | TempR lag 29, 0.046                      | Total mosquito abundance, 0.106          |
|                         | IRSAD, 0.030                            |                                          | TempR lag 51, -0.085                     |
