# Supplementary material for: Prediction of Ross River Virus Incidence Using Mosquito Data in Three Cities of Queensland, Australia
Source: Biology (Basel). 2023 Nov 13;12(11):1429. doi: 10.3390/biology12111429 (PMC10669834; doi:10.3390/biology12111429)
Supplement: Supplementary file 1 [file biology-12-01429-s001.zip]

Archive with 5 entries (5 files):
- Supplementary Figure S1.tiff
- Supplementary Figure S2.tiff
- Supplementary Table_S1_Predictors selected.pdf
- Supplementary Text_S1_Details of methods .pdf
- Supplementary Text_S2_R code.pdf
